# Supplementary material for: Secondary Metabolites of a Mangrove Endophytic Fungus Aspergillus terreus (No. GX7-3B) from the South China Sea
Source: PubMed Central journal article supplement (PMC3736441; doi:10.3390/md11072616), 2013-07-19

# Supplementary Information

Figure S1.  $^1\text{H}$ ,  $^{13}\text{C}$ , Dept 135, Dept 90,  $^1\text{H}$ - $^1\text{H}$  cosy, HMQC, HMBC of compound 1.

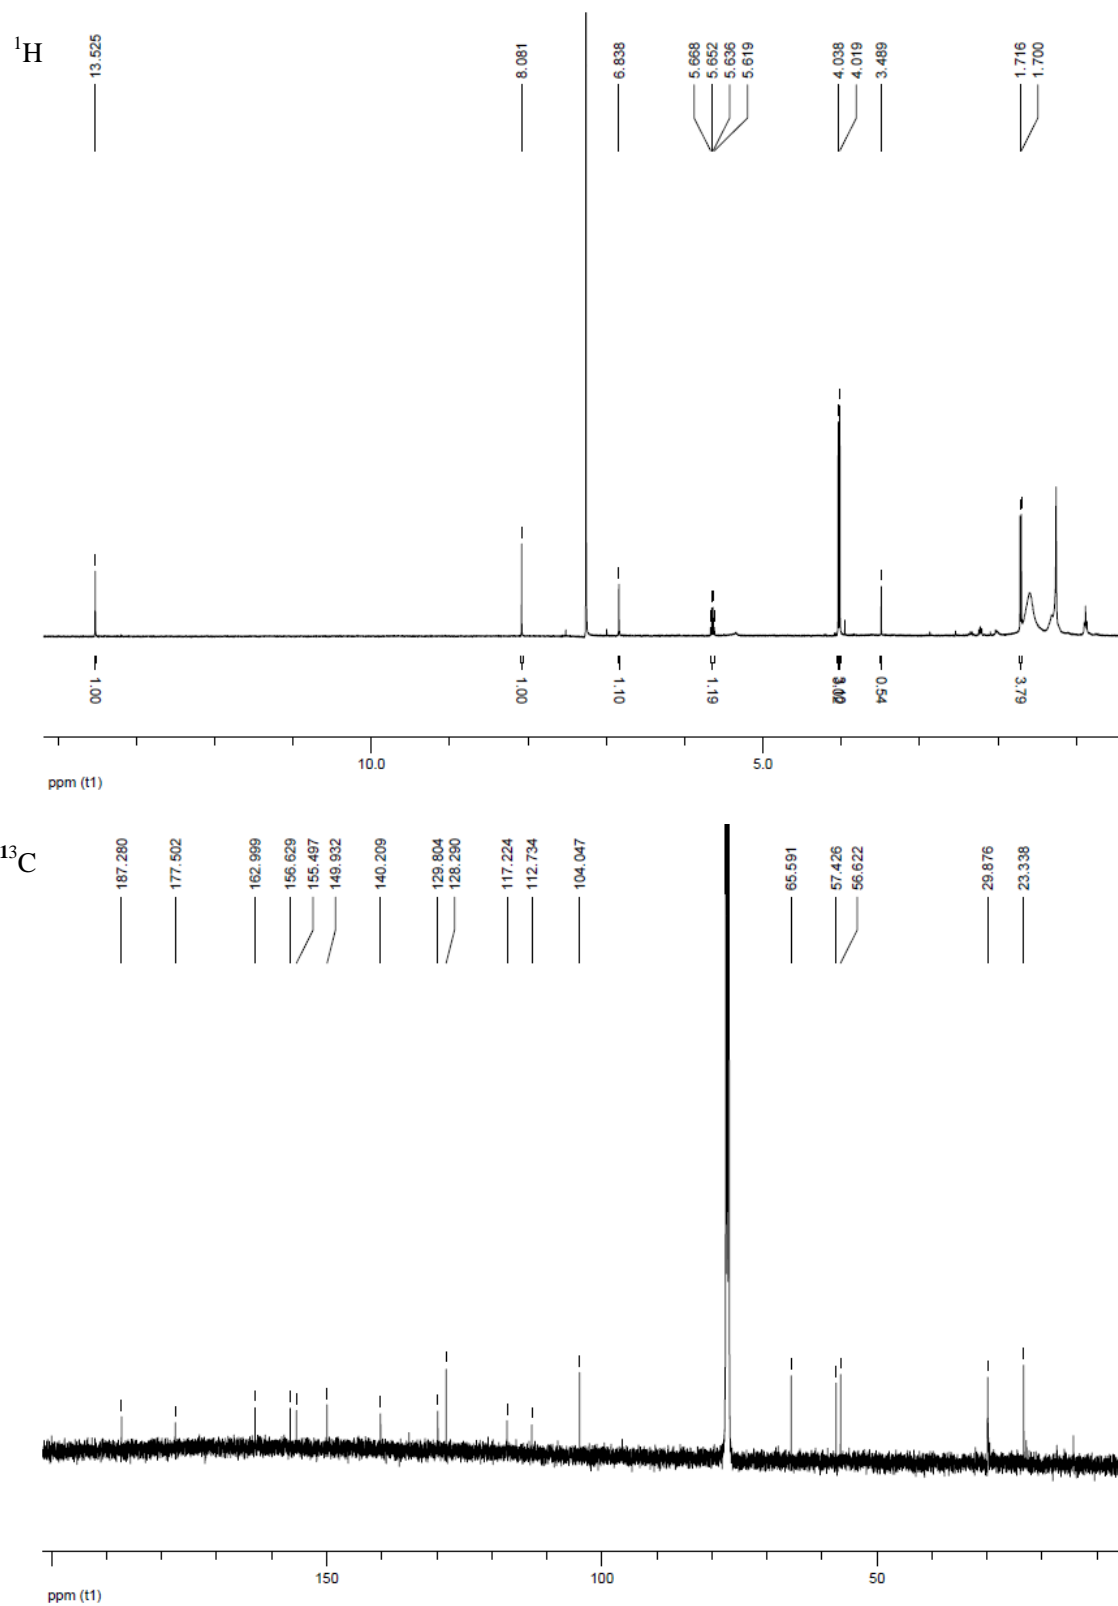

Figure S1. Cont.

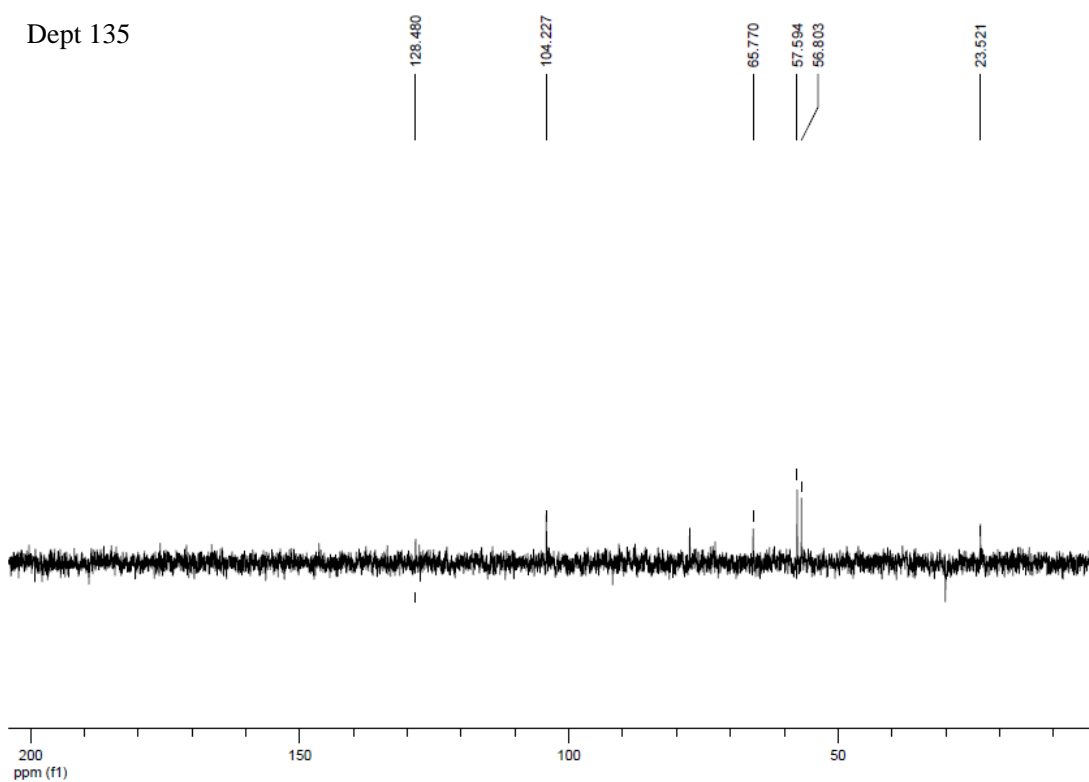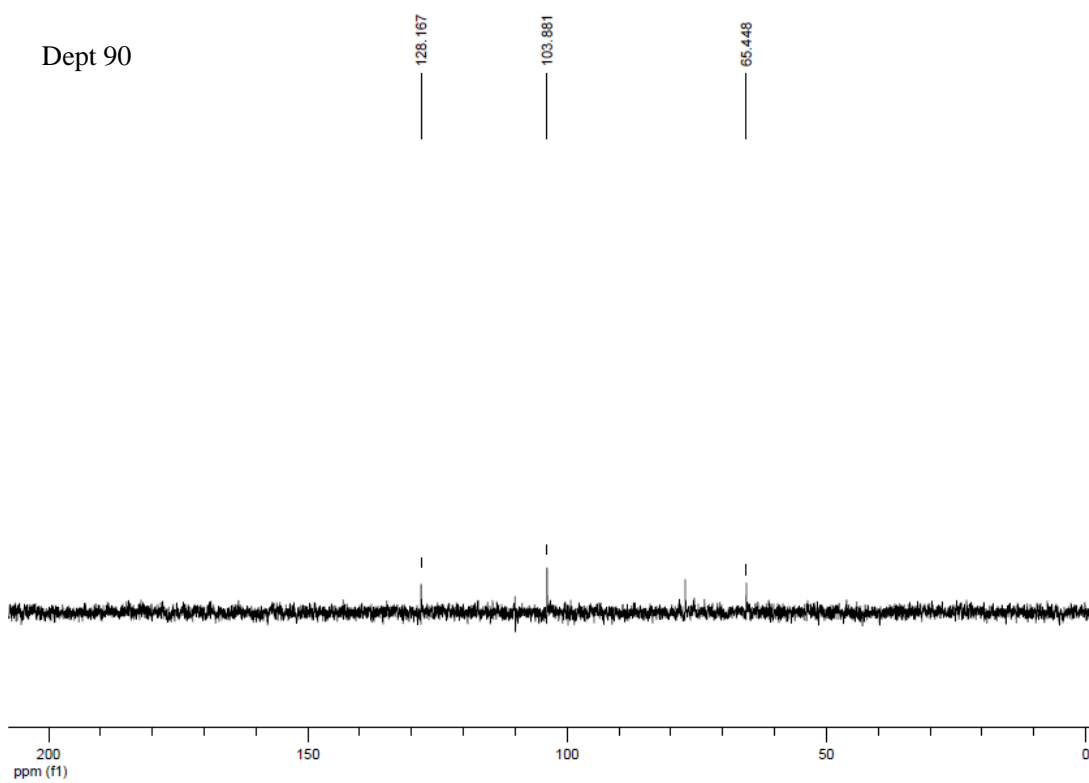

Figure S1. Cont.

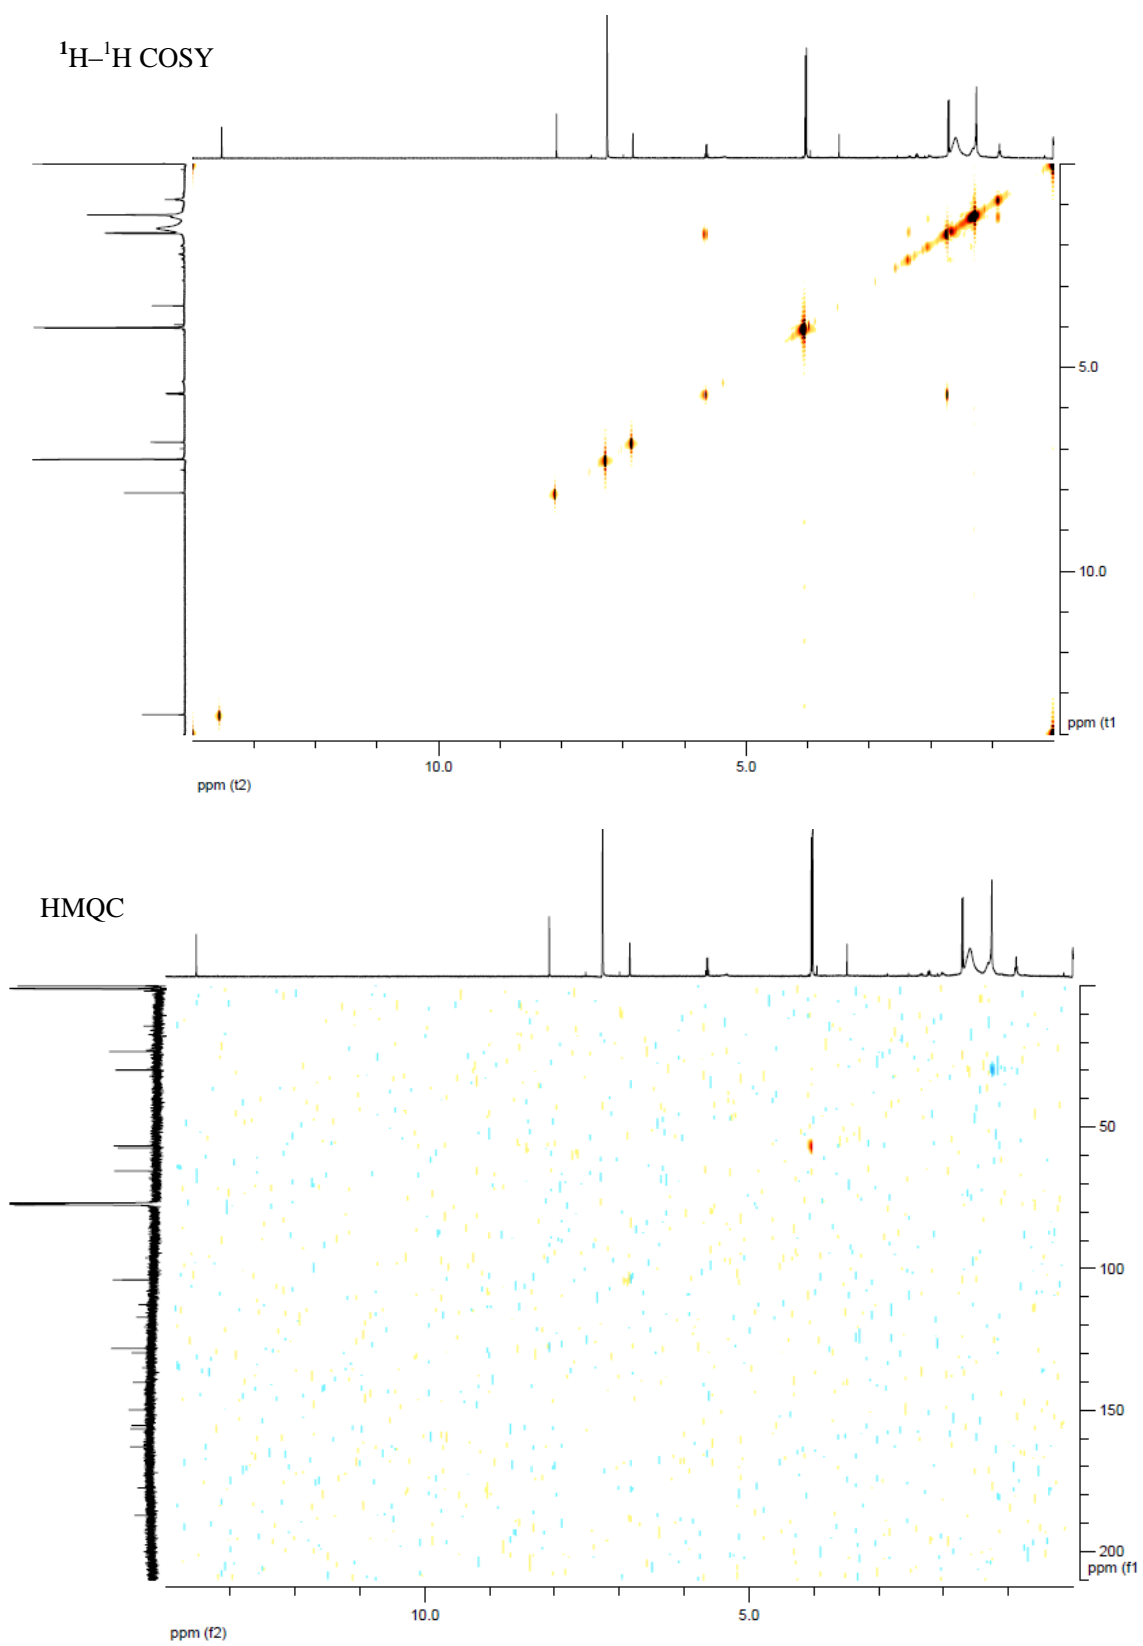

Figure S1. Cont.

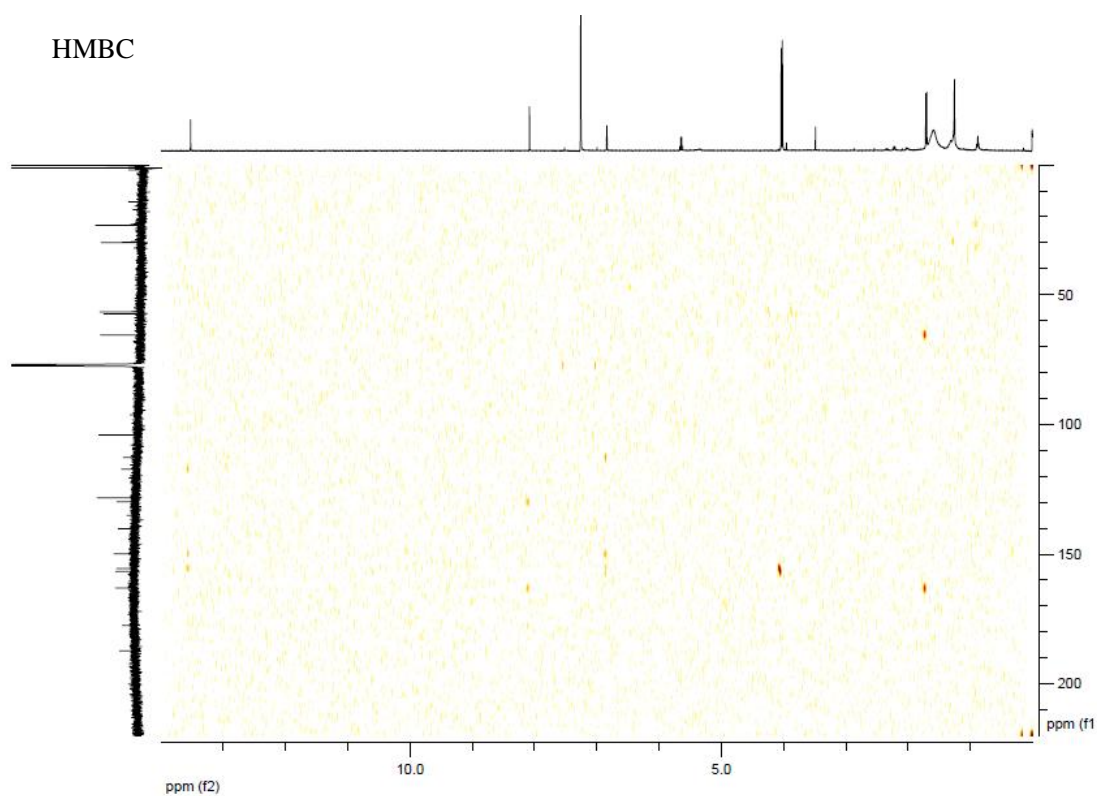

Figure S2. HR-EIMS of compound 1.

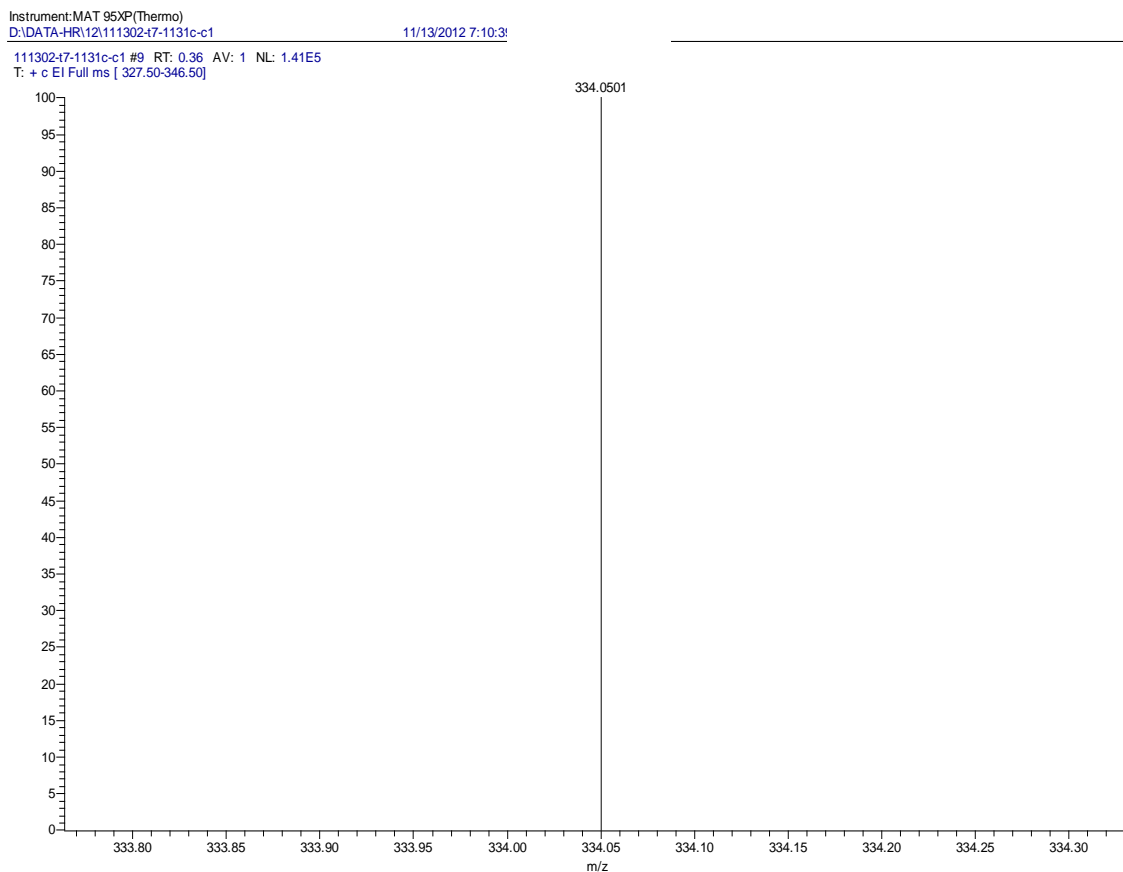

Figure S3. ESI of compound 1.

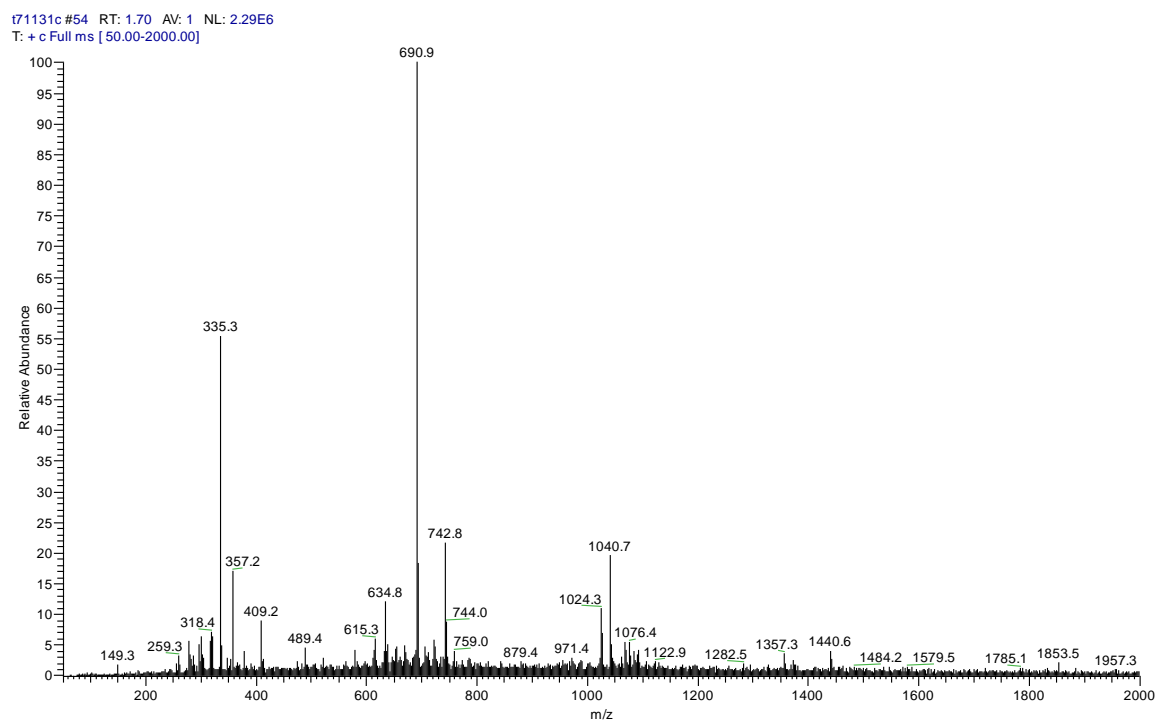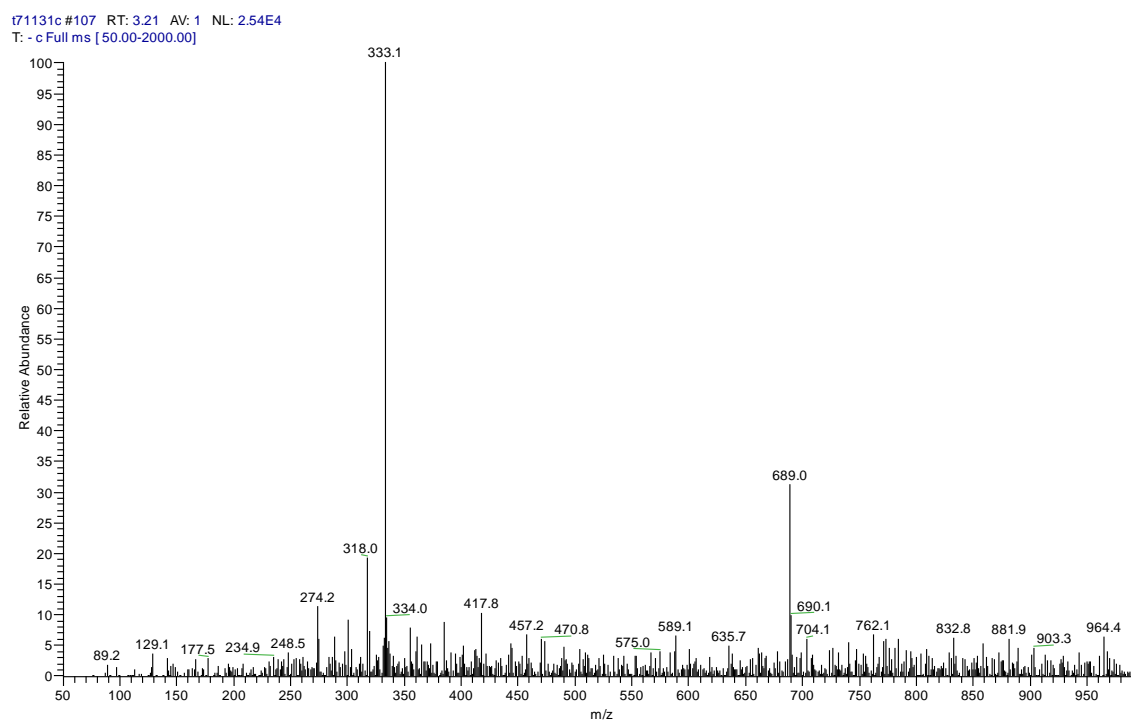

Figure S4. IR of compound 1.

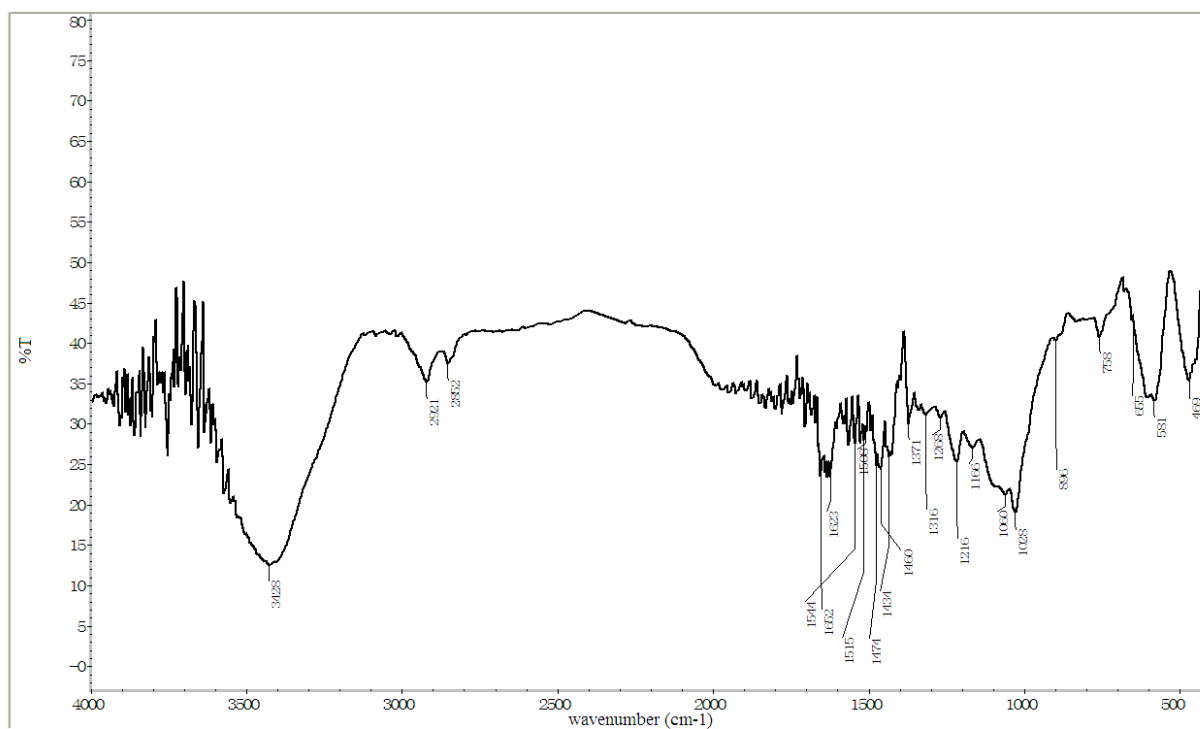

\*\*A1212072 (t7-1131C)

Figure S5. UV of compound 1.

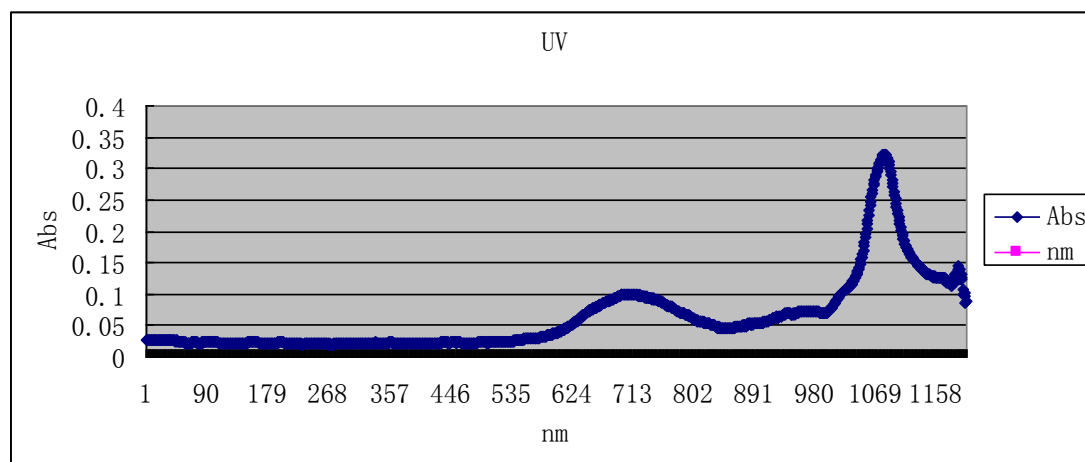

Supplement: marinedrugs-11-02616-s001.pdf [file marinedrugs-11-02616-s001.pdf]
