# Supplementary material for: Secondary Metabolites of a Mangrove Endophytic Fungus Aspergillus terreus (No. GX7-3B) from the South China Sea
Source: MDPI journal article supplement (doi:10.3390/md11072616), 2013-07-19
Supplement: s2 [file s2]

marinedrugs-11-02616-s001.mol
  corina  04141406183D 1   1.00000     0.00000 
CORINA 3.49 0023  12.04.2013
 23 25  0  0  0  0  0  0  0  0999 V2000
   -0.0167    1.3768    0.0096 C   0  0  0  0  0  0  0  0  0  0  0  0
    0.0021   -0.0041    0.0020 C   0  0  0  0  0  0  0  0  0  0  0  0
    1.2226   -0.6947   -0.0126 C   0  0  0  0  0  0  0  0  0  0  0  0
    2.4214    0.0149   -0.0191 C   0  0  0  0  0  0  0  0  0  0  0  0
    2.4004    1.4252   -0.0129 C   0  0  0  0  0  0  0  0  0  0  0  0
    1.1737    2.0979    0.0021 C   0  0  0  0  0  0  0  0  0  0  0  0
    3.7084   -0.7211   -0.0311 C   0  0  0  0  0  0  0  0  0  0  0  0
    4.9300    0.0639    0.2153 C   0  0  0  0  0  0  0  0  0  0  0  0
    4.9231    1.4598    0.2234 C   0  0  0  0  0  0  0  0  0  0  0  0
    3.6559    2.2036   -0.0209 C   0  0  0  0  0  0  0  0  0  0  0  0
    6.1799    1.9833    0.4750 C   0  0  0  0  0  0  0  0  0  0  0  0
    7.1485    1.0821    0.6600 C   0  0  0  0  0  0  0  0  0  0  0  0
    6.5509   -0.5111    0.5312 S   0  0  0  0  0  0  0  0  0  0  0  0
    8.5869    1.4286    0.9464 C   0  0  0  0  0  0  0  0  0  0  0  0
    9.1422    0.4589    1.8371 O   0  0  0  0  0  0  0  0  0  0  0  0
    9.3805    1.4332   -0.3617 C   0  0  0  0  0  0  0  0  0  0  0  0
    3.6549    3.4036   -0.2206 O   0  0  0  0  0  0  0  0  0  0  0  0
    3.7533   -1.9201   -0.2349 O   0  0  0  0  0  0  0  0  0  0  0  0
    1.1445    3.4535    0.0091 O   0  0  0  0  0  0  0  0  0  0  0  0
   -0.1424    4.0746    0.0244 C   0  0  0  0  0  0  0  0  0  0  0  0
   -1.1659   -0.6958    0.0091 O   0  0  0  0  0  0  0  0  0  0  0  0
   -2.3728    0.0690    0.0245 C   0  0  0  0  0  0  0  0  0  0  0  0
    1.2358   -2.0511   -0.0198 O   0  0  0  0  0  0  0  0  0  0  0  0
  1  2  2  0      
  2  3  1  0      
  3  4  2  0      
  4  5  1  0      
  5  6  2  0      
  6  1  1  0      
  4  7  1  0      
  7  8  1  0      
  8  9  2  0      
  9 10  1  0      
 10  5  1  0      
  9 11  1  0      
 11 12  2  0      
  8 13  1  0      
 12 13  1  0      
 12 14  1  0      
 14 15  1  0      
 14 16  1  0      
 10 17  2  0      
  7 18  2  0      
  6 19  1  0      
 19 20  1  0      
  2 21  1  0      
 21 22  1  0      
  3 23  1  0      
M  END
$$$$
