# Supplementary material for: Secondary Metabolites of a Mangrove Endophytic Fungus Aspergillus terreus (No. GX7-3B) from the South China Sea
Source: MDPI journal article supplement (doi:10.3390/md11072616), 2013-07-19
Supplement: s3 [file s3]

marinedrugs-11-02616-s001.mol
  ChemDraw01201408392D

 23 25  0  0  0  0  0  0  0  0999 V2000
   -1.9379    0.2062    0.0000 C   0  0  0  0  0  0  0  0  0  0  0  0
   -1.9379   -0.6188    0.0000 C   0  0  0  0  0  0  0  0  0  0  0  0
   -1.2234   -1.0313    0.0000 C   0  0  0  0  0  0  0  0  0  0  0  0
   -0.5090   -0.6188    0.0000 C   0  0  0  0  0  0  0  0  0  0  0  0
   -0.5090    0.2062    0.0000 C   0  0  0  0  0  0  0  0  0  0  0  0
   -1.2234    0.6188    0.0000 C   0  0  0  0  0  0  0  0  0  0  0  0
    0.2055   -1.0313    0.0000 C   0  0  0  0  0  0  0  0  0  0  0  0
    0.9200   -0.6188    0.0000 C   0  0  0  0  0  0  0  0  0  0  0  0
    0.9200    0.2062    0.0000 C   0  0  0  0  0  0  0  0  0  0  0  0
    0.2055    0.6188    0.0000 C   0  0  0  0  0  0  0  0  0  0  0  0
    1.7169    0.4198    0.0000 C   0  0  0  0  0  0  0  0  0  0  0  0
    2.1294   -0.2947    0.0000 C   0  0  0  0  0  0  0  0  0  0  0  0
    1.6434   -0.7838    0.0000 S   0  0  0  0  0  0  0  0  0  0  0  0
    2.9544   -0.2947    0.0000 C   0  0  0  0  0  0  0  0  0  0  0  0
    3.3669   -1.0092    0.0000 O   0  0  0  0  0  0  0  0  0  0  0  0
    3.3669    0.4198    0.0000 C   0  0  0  0  0  0  0  0  0  0  0  0
    0.2055    1.4438    0.0000 O   0  0  0  0  0  0  0  0  0  0  0  0
    0.2055   -1.8563    0.0000 O   0  0  0  0  0  0  0  0  0  0  0  0
   -1.2234    1.4438    0.0000 O   0  0  0  0  0  0  0  0  0  0  0  0
   -1.9379    1.8563    0.0000 C   0  0  0  0  0  0  0  0  0  0  0  0
   -2.6524   -1.0313    0.0000 O   0  0  0  0  0  0  0  0  0  0  0  0
   -3.3669   -0.6188    0.0000 C   0  0  0  0  0  0  0  0  0  0  0  0
   -1.2234   -1.8563    0.0000 O   0  0  0  0  0  0  0  0  0  0  0  0
  1  2  2  0      
  2  3  1  0      
  3  4  2  0      
  4  5  1  0      
  5  6  2  0      
  6  1  1  0      
  4  7  1  0      
  7  8  1  0      
  8  9  2  0      
  9 10  1  0      
 10  5  1  0      
  9 11  1  0      
 11 12  2  0      
  8 13  1  0      
 12 13  1  0      
 12 14  1  0      
 14 15  1  0      
 14 16  1  0      
 10 17  2  0      
  7 18  2  0      
  6 19  1  0      
 19 20  1  0      
  2 21  1  0      
 21 22  1  0      
  3 23  1  0      
M  END
