# Supplementary material for: Secondary Metabolites of a Mangrove Endophytic Fungus Aspergillus terreus (No. GX7-3B) from the South China Sea
Source: MDPI journal article supplement (doi:10.3390/md11072616), 2013-07-19
Supplement: s4 [file s4]

marinedrugs-11-02616-s002.mol
  corina  04141406183D 1   1.00000     0.00000 
CORINA 3.49 0023  12.04.2013
 20 22  0  0  0  0  0  0  0  0999 V2000
   -0.0164    1.3568    0.0095 C   0  0  0  0  0  0  0  0  0  0  0  0
    0.0021   -0.0041    0.0020 C   0  0  0  0  0  0  0  0  0  0  0  0
    1.2080   -0.7155   -0.0047 C   0  0  0  0  0  0  0  0  0  0  0  0
    2.4110   -0.0002   -0.0156 C   0  0  0  0  0  0  0  0  0  0  0  0
    2.3937    1.4091   -0.0129 C   0  0  0  0  0  0  0  0  0  0  0  0
    1.1770    2.0870    0.0020 C   0  0  0  0  0  0  0  0  0  0  0  0
    3.7080   -0.6995   -0.0296 C   0  0  0  0  0  0  0  0  0  0  0  0
    4.9436    0.0689    0.2571 C   0  0  0  0  0  0  0  0  0  0  0  0
    4.9204    1.4197    0.2574 C   0  0  0  0  0  0  0  0  0  0  0  0
    3.6749    2.1424   -0.0260 C   0  0  0  0  0  0  0  0  0  0  0  0
    3.6980    3.3345   -0.2694 O   0  0  0  0  0  0  0  0  0  0  0  0
    3.7643   -1.8891   -0.2722 O   0  0  0  0  0  0  0  0  0  0  0  0
    1.1494    3.4423    0.0096 O   0  0  0  0  0  0  0  0  0  0  0  0
    6.0990   -0.5857    0.5200 O   0  0  0  0  0  0  0  0  0  0  0  0
    7.2519    0.2151    0.7879 C   0  0  0  0  0  0  0  0  0  0  0  0
   -1.1136   -1.0326   -0.0116 C   0  0  0  0  0  0  0  0  0  0  0  0
   -0.3590   -2.3185   -0.4233 C   0  0  0  0  0  0  0  0  0  0  0  0
    0.9855   -2.0546    0.0113 O   0  0  0  0  0  0  0  0  0  0  0  0
   -1.3359    2.0847    0.0197 C   0  0  0  0  0  0  0  0  0  0  0  0
   -0.9325   -3.5382    0.3007 C   0  0  0  0  0  0  0  0  0  0  0  0
  1  2  2  0      
  2  3  1  0      
  3  4  2  0      
  4  5  1  0      
  5  6  2  0      
  6  1  1  0      
  4  7  1  0      
  7  8  1  0      
  8  9  2  0      
  9 10  1  0      
 10  5  1  0      
 10 11  2  0      
  7 12  2  0      
  6 13  1  0      
  8 14  1  0      
 14 15  1  0      
  2 16  1  0      
 16 17  1  0      
 17 18  1  0      
 18  3  1  0      
  1 19  1  0      
 17 20  1  0      
M  STY  1   1 SUP
M  SLB  1   1   1
M  SAL   1  1  20
M  SBL   1  1  22
M  SMT   1 Me
M  SBV   1 22   -7.4043    5.7408
M  END
$$$$
