# Supplementary material for: Secondary Metabolites of a Mangrove Endophytic Fungus Aspergillus terreus (No. GX7-3B) from the South China Sea
Source: MDPI journal article supplement (doi:10.3390/md11072616), 2013-07-19
Supplement: s5 [file s5]

marinedrugs-11-02616-s002.mol
  ChemDraw01201408402D

 20 22  0  0  0  0  0  0  0  0999 V2000
   -1.7862    0.8037    0.0000 C   0  0  0  0  0  0  0  0  0  0  0  0
   -1.7862   -0.0213    0.0000 C   0  0  0  0  0  0  0  0  0  0  0  0
   -1.0717   -0.4338    0.0000 C   0  0  0  0  0  0  0  0  0  0  0  0
   -0.3572   -0.0213    0.0000 C   0  0  0  0  0  0  0  0  0  0  0  0
   -0.3572    0.8037    0.0000 C   0  0  0  0  0  0  0  0  0  0  0  0
   -1.0717    1.2162    0.0000 C   0  0  0  0  0  0  0  0  0  0  0  0
    0.3572   -0.4338    0.0000 C   0  0  0  0  0  0  0  0  0  0  0  0
    1.0717   -0.0213    0.0000 C   0  0  0  0  0  0  0  0  0  0  0  0
    1.0717    0.8037    0.0000 C   0  0  0  0  0  0  0  0  0  0  0  0
    0.3572    1.2162    0.0000 C   0  0  0  0  0  0  0  0  0  0  0  0
    0.3572    2.0412    0.0000 O   0  0  0  0  0  0  0  0  0  0  0  0
    0.3572   -1.2588    0.0000 O   0  0  0  0  0  0  0  0  0  0  0  0
   -1.0717    2.0412    0.0000 O   0  0  0  0  0  0  0  0  0  0  0  0
    1.7862   -0.4338    0.0000 O   0  0  0  0  0  0  0  0  0  0  0  0
    2.5006   -0.0213    0.0000 C   0  0  0  0  0  0  0  0  0  0  0  0
   -2.3993   -0.5733    0.0000 C   0  0  0  0  0  0  0  0  0  0  0  0
   -2.0637   -1.3270    0.0000 C   0  0  0  0  0  0  0  0  0  0  0  0
   -1.2432   -1.2408    0.0000 O   0  0  0  0  0  0  0  0  0  0  0  0
   -2.5006    1.2162    0.0000 C   0  0  0  0  0  0  0  0  0  0  0  0
   -2.4770   -2.0412    0.0000 C   0  0  0  0  0  0  0  0  0  0  0  0
  1  2  2  0      
  2  3  1  0      
  3  4  2  0      
  4  5  1  0      
  5  6  2  0      
  6  1  1  0      
  4  7  1  0      
  7  8  1  0      
  8  9  2  0      
  9 10  1  0      
 10  5  1  0      
 10 11  2  0      
  7 12  2  0      
  6 13  1  0      
  8 14  1  0      
 14 15  1  0      
  2 16  1  0      
 16 17  1  0      
 17 18  1  0      
 18  3  1  0      
  1 19  1  0      
 17 20  1  1      
M  STY  1   1 SUP
M  SLB  1   1   1
M  SAL   1  1  20
M  SBL   1  1  22
M  SMT   1 Me
M  SBV   1 22   -7.4043    5.7408
M  END
