# Supplementary material for: Secondary Metabolites of a Mangrove Endophytic Fungus Aspergillus terreus (No. GX7-3B) from the South China Sea
Source: MDPI journal article supplement (doi:10.3390/md11072616), 2013-07-19
Supplement: s6 [file s6]

marinedrugs-11-02616-s003.mol
  corina  04141406183D 1   1.00000     0.00000 
CORINA 3.49 0023  12.04.2013
 22 24  0  0  0  0  0  0  0  0999 V2000
   -0.0167    1.3771    0.0096 C   0  0  0  0  0  0  0  0  0  0  0  0
    0.0021   -0.0041    0.0020 C   0  0  0  0  0  0  0  0  0  0  0  0
    1.2216   -0.6970   -0.0132 C   0  0  0  0  0  0  0  0  0  0  0  0
    2.4200    0.0134   -0.0204 C   0  0  0  0  0  0  0  0  0  0  0  0
    2.3976    1.4265   -0.0131 C   0  0  0  0  0  0  0  0  0  0  0  0
    1.1734    2.1000    0.0021 C   0  0  0  0  0  0  0  0  0  0  0  0
    3.7123   -0.6974   -0.0352 C   0  0  0  0  0  0  0  0  0  0  0  0
    4.9502    0.0589    0.2535 C   0  0  0  0  0  0  0  0  0  0  0  0
    4.9267    1.4665    0.2600 C   0  0  0  0  0  0  0  0  0  0  0  0
    3.6632    2.1783   -0.0220 C   0  0  0  0  0  0  0  0  0  0  0  0
    3.6686    3.3713   -0.2589 O   0  0  0  0  0  0  0  0  0  0  0  0
    3.7592   -1.8869   -0.2806 O   0  0  0  0  0  0  0  0  0  0  0  0
    1.1443    3.4556    0.0100 O   0  0  0  0  0  0  0  0  0  0  0  0
    1.2341   -2.0531   -0.0204 O   0  0  0  0  0  0  0  0  0  0  0  0
   -0.1425    4.0768    0.0255 C   0  0  0  0  0  0  0  0  0  0  0  0
   -1.1664   -0.6948    0.0098 O   0  0  0  0  0  0  0  0  0  0  0  0
   -2.3727    0.0711    0.0257 C   0  0  0  0  0  0  0  0  0  0  0  0
    6.1523   -0.5869    0.5228 C   0  0  0  0  0  0  0  0  0  0  0  0
    7.2755    0.1830    0.7862 C   0  0  0  0  0  0  0  0  0  0  0  0
    7.2178    1.5000    0.7840 N   0  0  0  0  0  0  0  0  0  0  0  0
    6.1020    2.1584    0.5344 C   0  0  0  0  0  0  0  0  0  0  0  0
    8.5866   -0.4990    1.0811 C   0  0  0  0  0  0  0  0  0  0  0  0
  1  2  2  0      
  2  3  1  0      
  3  4  2  0      
  4  5  1  0      
  5  6  2  0      
  6  1  1  0      
  4  7  1  0      
  7  8  1  0      
  8  9  2  0      
  9 10  1  0      
 10  5  1  0      
 10 11  2  0      
  7 12  2  0      
  6 13  1  0      
 14  3  1  0      
 13 15  1  0      
  2 16  1  0      
 16 17  1  0      
  8 18  1  0      
 18 19  2  0      
 19 20  1  0      
 20 21  2  0      
 21  9  1  0      
 19 22  1  0      
M  END
$$$$
