# Supplementary material for: Secondary Metabolites of a Mangrove Endophytic Fungus Aspergillus terreus (No. GX7-3B) from the South China Sea
Source: MDPI journal article supplement (doi:10.3390/md11072616), 2013-07-19
Supplement: s8 [file s8]

marinedrugs-11-02616-s004.mol
  corina  04141406183D 1   1.00000     0.00000 
CORINA 3.49 0023  12.04.2013
 22 23  0  0  0  0  0  0  0  0999 V2000
   -0.0166    1.3753    0.0096 C   0  0  0  0  0  0  0  0  0  0  0  0
    0.0021   -0.0041    0.0020 C   0  0  0  0  0  0  0  0  0  0  0  0
    1.2252   -0.6997   -0.0129 C   0  0  0  0  0  0  0  0  0  0  0  0
    2.4211    0.0120   -0.0201 C   0  0  0  0  0  0  0  0  0  0  0  0
    2.3981    1.4245   -0.0130 C   0  0  0  0  0  0  0  0  0  0  0  0
    1.1757    2.1000    0.0021 C   0  0  0  0  0  0  0  0  0  0  0  0
    3.7225   -0.6802   -0.0340 C   0  0  0  0  0  0  0  0  0  0  0  0
    4.9488    0.0871    0.2576 C   0  0  0  0  0  0  0  0  0  0  0  0
    4.9253    1.4293    0.2635 C   0  0  0  0  0  0  0  0  0  0  0  0
    3.6732    2.1572   -0.0213 C   0  0  0  0  0  0  0  0  0  0  0  0
    3.6957    3.3499   -0.2597 O   0  0  0  0  0  0  0  0  0  0  0  0
    3.7848   -1.8690   -0.2822 O   0  0  0  0  0  0  0  0  0  0  0  0
    1.1477    3.4547    0.0099 O   0  0  0  0  0  0  0  0  0  0  0  0
    1.2385   -2.0548   -0.0199 O   0  0  0  0  0  0  0  0  0  0  0  0
   -0.1386    4.0770    0.0253 C   0  0  0  0  0  0  0  0  0  0  0  0
   -1.1662   -0.6943    0.0095 O   0  0  0  0  0  0  0  0  0  0  0  0
   -2.3724    0.0718    0.0251 C   0  0  0  0  0  0  0  0  0  0  0  0
    6.2354   -0.6405    0.5511 C   0  0  0  0  0  0  0  0  0  0  0  0
    6.2855   -1.0027    2.0131 C   0  0  0  0  0  0  0  0  0  0  0  0
    5.3708   -0.7011    2.7415 O   0  0  0  0  0  0  0  0  0  0  0  0
    6.1861    2.1984    0.5634 C   0  0  0  0  0  0  0  0  0  0  0  0
    7.4770   -1.7413    2.5660 C   0  0  0  0  0  0  0  0  0  0  0  0
  1  2  2  0      
  2  3  1  0      
  3  4  2  0      
  4  5  1  0      
  5  6  2  0      
  6  1  1  0      
  4  7  1  0      
  7  8  1  0      
  8  9  2  0      
  9 10  1  0      
 10  5  1  0      
 10 11  2  0      
  7 12  2  0      
  6 13  1  0      
 14  3  1  0      
 13 15  1  0      
  2 16  1  0      
 16 17  1  0      
  8 18  1  0      
 18 19  1  0      
 19 20  2  0      
 21  9  1  0      
 19 22  1  0      
M  END
$$$$
