# Supplementary material for: Secondary Metabolites of a Mangrove Endophytic Fungus Aspergillus terreus (No. GX7-3B) from the South China Sea
Source: MDPI journal article supplement (doi:10.3390/md11072616), 2013-07-19
Supplement: s9 [file s9]

marinedrugs-11-02616-s004.mol
  ChemDraw01201408402D

 22 23  0  0  0  0  0  0  0  0999 V2000
   -1.7862    0.2062    0.0000 C   0  0  0  0  0  0  0  0  0  0  0  0
   -1.7862   -0.6188    0.0000 C   0  0  0  0  0  0  0  0  0  0  0  0
   -1.0717   -1.0313    0.0000 C   0  0  0  0  0  0  0  0  0  0  0  0
   -0.3572   -0.6188    0.0000 C   0  0  0  0  0  0  0  0  0  0  0  0
   -0.3572    0.2062    0.0000 C   0  0  0  0  0  0  0  0  0  0  0  0
   -1.0717    0.6188    0.0000 C   0  0  0  0  0  0  0  0  0  0  0  0
    0.3572   -1.0313    0.0000 C   0  0  0  0  0  0  0  0  0  0  0  0
    1.0717   -0.6188    0.0000 C   0  0  0  0  0  0  0  0  0  0  0  0
    1.0717    0.2062    0.0000 C   0  0  0  0  0  0  0  0  0  0  0  0
    0.3572    0.6188    0.0000 C   0  0  0  0  0  0  0  0  0  0  0  0
    0.3572    1.4438    0.0000 O   0  0  0  0  0  0  0  0  0  0  0  0
    0.3572   -1.8563    0.0000 O   0  0  0  0  0  0  0  0  0  0  0  0
   -1.0717    1.4438    0.0000 O   0  0  0  0  0  0  0  0  0  0  0  0
   -1.0717   -1.8563    0.0000 O   0  0  0  0  0  0  0  0  0  0  0  0
   -1.7862    1.8563    0.0000 C   0  0  0  0  0  0  0  0  0  0  0  0
   -2.5006   -1.0313    0.0000 O   0  0  0  0  0  0  0  0  0  0  0  0
   -3.2151   -0.6188    0.0000 C   0  0  0  0  0  0  0  0  0  0  0  0
    1.7862   -1.0313    0.0000 C   0  0  0  0  0  0  0  0  0  0  0  0
    2.5006   -0.6188    0.0000 C   0  0  0  0  0  0  0  0  0  0  0  0
    2.5006    0.2062    0.0000 O   0  0  0  0  0  0  0  0  0  0  0  0
    1.7862    0.6188    0.0000 C   0  0  0  0  0  0  0  0  0  0  0  0
    3.2151   -1.0313    0.0000 C   0  0  0  0  0  0  0  0  0  0  0  0
  1  2  2  0      
  2  3  1  0      
  3  4  2  0      
  4  5  1  0      
  5  6  2  0      
  6  1  1  0      
  4  7  1  0      
  7  8  1  0      
  8  9  2  0      
  9 10  1  0      
 10  5  1  0      
 10 11  2  0      
  7 12  2  0      
  6 13  1  0      
 14  3  1  0      
 13 15  1  0      
  2 16  1  0      
 16 17  1  0      
  8 18  1  0      
 18 19  1  0      
 19 20  2  0      
 21  9  1  0      
 19 22  1  0      
M  END
