# Supplementary material for: Secondary Metabolites of a Mangrove Endophytic Fungus Aspergillus terreus (No. GX7-3B) from the South China Sea
Source: MDPI journal article supplement (doi:10.3390/md11072616), 2013-07-19
Supplement: s10 [file s10]

marinedrugs-11-02616-s005.mol
  ChemDraw01201408402D

 18 19  0  0  0  0  0  0  0  0999 V2000
   -2.5006    0.4125    0.0000 C   0  0  0  0  0  0  0  0  0  0  0  0
   -2.5006   -0.4125    0.0000 C   0  0  0  0  0  0  0  0  0  0  0  0
   -1.7862   -0.8250    0.0000 O   0  0  0  0  0  0  0  0  0  0  0  0
   -1.0717   -0.4125    0.0000 C   0  0  0  0  0  0  0  0  0  0  0  0
   -1.0717    0.4125    0.0000 C   0  0  0  0  0  0  0  0  0  0  0  0
   -1.7862    0.8250    0.0000 C   0  0  0  0  0  0  0  0  0  0  0  0
   -0.3572   -0.8250    0.0000 C   0  0  0  0  0  0  0  0  0  0  0  0
    0.3572   -0.4125    0.0000 C   0  0  0  0  0  0  0  0  0  0  0  0
    0.3572    0.4125    0.0000 C   0  0  0  0  0  0  0  0  0  0  0  0
   -0.3572    0.8250    0.0000 C   0  0  0  0  0  0  0  0  0  0  0  0
   -0.3572    1.6500    0.0000 O   0  0  0  0  0  0  0  0  0  0  0  0
    1.0717   -0.8250    0.0000 C   0  0  0  0  0  0  0  0  0  0  0  0
    1.7862   -0.4125    0.0000 C   0  0  0  0  0  0  0  0  0  0  0  0
    1.7862    0.4125    0.0000 C   0  0  0  0  0  0  0  0  0  0  0  0
    1.0717    0.8250    0.0000 C   0  0  0  0  0  0  0  0  0  0  0  0
    1.0717   -1.6500    0.0000 O   0  0  0  0  0  0  0  0  0  0  0  0
    2.5006   -0.8250    0.0000 O   0  0  0  0  0  0  0  0  0  0  0  0
    1.0717    1.6500    0.0000 O   0  0  0  0  0  0  0  0  0  0  0  0
  2  3  1  0      
  3  4  1  0      
  4  5  2  0      
  5  6  1  0      
  6  1  1  0      
  4  7  1  0      
  7  8  2  0      
  8  9  1  0      
  9 10  2  0      
 10  5  1  0      
 10 11  1  0      
  8 12  1  0      
 12 13  1  0      
 13 14  1  0      
 15  9  1  0      
 15 14  1  0      
 12 16  1  1      
 13 17  1  6      
 15 18  2  0      
M  END
