# Supplementary material for: Secondary Metabolites of a Mangrove Endophytic Fungus Aspergillus terreus (No. GX7-3B) from the South China Sea
Source: MDPI journal article supplement (doi:10.3390/md11072616), 2013-07-19
Supplement: s11 [file s11]

marinedrugs-11-02616-s005.mol
  corina  04141406183D 1   1.00000     0.00000 
CORINA 3.49 0023  12.04.2013
 18 19  0  0  0  0  0  0  0  0999 V2000
   -0.0187    1.5258    0.0104 C   0  0  0  0  0  0  0  0  0  0  0  0
   -2.1907   -0.7793   -3.5546 C   0  0  0  0  0  0  0  0  0  0  0  0
   -1.4508   -0.5169   -2.3606 O   0  0  0  0  0  0  0  0  0  0  0  0
   -2.0770   -0.7605   -1.1820 C   0  0  0  0  0  0  0  0  0  0  0  0
   -1.4117   -0.5257    0.0127 C   0  0  0  0  0  0  0  0  0  0  0  0
    0.0021   -0.0041    0.0020 C   0  0  0  0  0  0  0  0  0  0  0  0
   -3.3836   -1.2384   -1.1799 C   0  0  0  0  0  0  0  0  0  0  0  0
   -4.0325   -1.4894   -0.0013 C   0  0  0  0  0  0  0  0  0  0  0  0
   -3.3723   -1.2570    1.2105 C   0  0  0  0  0  0  0  0  0  0  0  0
   -2.0529   -0.7724    1.2147 C   0  0  0  0  0  0  0  0  0  0  0  0
   -1.4101   -0.5531    2.3885 O   0  0  0  0  0  0  0  0  0  0  0  0
   -5.4413   -2.0164   -0.0414 C   0  0  0  0  0  0  0  0  0  0  0  0
   -6.1793   -1.7198    1.2613 C   0  0  0  0  0  0  0  0  0  0  0  0
   -5.3677   -2.2683    2.4422 C   0  0  0  0  0  0  0  0  0  0  0  0
   -4.0587   -1.5079    2.4849 C   0  0  0  0  0  0  0  0  0  0  0  0
   -6.1403   -1.4022   -1.1259 O   0  0  0  0  0  0  0  0  0  0  0  0
   -7.4640   -2.3449    1.2344 O   0  0  0  0  0  0  0  0  0  0  0  0
   -3.5926   -1.1196    3.5357 O   0  0  0  0  0  0  0  0  0  0  0  0
  2  3  1  0      
  3  4  1  0      
  4  5  2  0      
  5  6  1  0      
  6  1  1  0      
  4  7  1  0      
  7  8  2  0      
  8  9  1  0      
  9 10  2  0      
 10  5  1  0      
 10 11  1  0      
  8 12  1  0      
 12 13  1  0      
 13 14  1  0      
 15  9  1  0      
 15 14  1  0      
 12 16  1  0      
 13 17  1  0      
 15 18  2  0      
M  END
$$$$
