# Supplementary material for: Secondary Metabolites of a Mangrove Endophytic Fungus Aspergillus terreus (No. GX7-3B) from the South China Sea
Source: MDPI journal article supplement (doi:10.3390/md11072616), 2013-07-19
Supplement: s12 [file s12]

marinedrugs-11-02616-s006.mol
  corina  04141406183D 1   1.00000     0.00000 
CORINA 3.49 0023  12.04.2013
 19 20  0  0  0  0  0  0  0  0999 V2000
   -0.0187    1.5258    0.0104 C   0  0  0  0  0  0  0  0  0  0  0  0
   -2.1691   -0.7739   -3.5561 C   0  0  0  0  0  0  0  0  0  0  0  0
   -1.4355   -0.5140   -2.3577 O   0  0  0  0  0  0  0  0  0  0  0  0
   -2.0689   -0.7575   -1.1826 C   0  0  0  0  0  0  0  0  0  0  0  0
   -1.4117   -0.5257    0.0127 C   0  0  0  0  0  0  0  0  0  0  0  0
    0.0021   -0.0041    0.0020 C   0  0  0  0  0  0  0  0  0  0  0  0
   -3.3821   -1.2351   -1.1885 C   0  0  0  0  0  0  0  0  0  0  0  0
   -4.0297   -1.4838    0.0091 C   0  0  0  0  0  0  0  0  0  0  0  0
   -3.3618   -1.2546    1.2298 C   0  0  0  0  0  0  0  0  0  0  0  0
   -2.0500   -0.7714    1.2253 C   0  0  0  0  0  0  0  0  0  0  0  0
   -1.4015   -0.5493    2.3944 O   0  0  0  0  0  0  0  0  0  0  0  0
   -5.4219   -1.9888    0.0356 C   0  0  0  0  0  0  0  0  0  0  0  0
   -6.1744   -1.9565    1.2945 C   0  0  0  0  0  0  0  0  0  0  0  0
   -5.5379   -1.7373    2.4662 C   0  0  0  0  0  0  0  0  0  0  0  0
   -4.0693   -1.5251    2.4918 C   0  0  0  0  0  0  0  0  0  0  0  0
   -5.9362   -2.4256   -0.9762 O   0  0  0  0  0  0  0  0  0  0  0  0
   -3.4585   -1.5748    3.5414 O   0  0  0  0  0  0  0  0  0  0  0  0
   -6.2427   -1.7109    3.6211 O   0  0  0  0  0  0  0  0  0  0  0  0
   -7.6528   -1.9220    3.5256 C   0  0  0  0  0  0  0  0  0  0  0  0
  2  3  1  0      
  3  4  1  0      
  4  5  2  0      
  5  6  1  0      
  6  1  1  0      
  4  7  1  0      
  7  8  2  0      
  8  9  1  0      
  9 10  2  0      
 10  5  1  0      
 10 11  1  0      
  8 12  1  0      
 12 13  1  0      
 13 14  2  0      
 15  9  1  0      
 15 14  1  0      
 15 17  2  0      
 12 16  2  0      
 14 18  1  0      
 18 19  1  0      
M  END
$$$$
