# Supplementary material for: Secondary Metabolites of a Mangrove Endophytic Fungus Aspergillus terreus (No. GX7-3B) from the South China Sea
Source: MDPI journal article supplement (doi:10.3390/md11072616), 2013-07-19
Supplement: s16 [file s16]

marinedrugs-11-02616-s008.mol
  corina  04141406193D 1   1.00000     0.00000 
CORINA 3.49 0023  12.04.2013
 34 37  0  0  0  0  0  0  0  0999 V2000
   -0.3174    0.9939    0.0454 C   0  0  0  0  0  0  0  0  0  0  0  0
   -0.0230   -0.5022    0.1698 C   0  0  0  0  0  0  0  0  0  0  0  0
    0.9958    1.7629   -0.1160 C   0  0  0  0  0  0  0  0  0  0  0  0
    1.8826    1.5147    1.1057 C   0  0  0  0  0  0  0  0  0  0  0  0
    2.1784    0.0204    1.2251 C   0  0  0  0  0  0  0  0  0  0  0  0
    0.8668   -0.7489    1.3902 C   0  0  0  0  0  0  0  0  0  0  0  0
    3.2065    2.2271    0.9143 C   0  0  0  0  0  0  0  0  0  0  0  0
    4.2788    1.8740    1.8528 C   0  0  0  0  0  0  0  0  0  0  0  0
    4.2259    0.7297    2.5247 C   0  0  0  0  0  0  0  0  0  0  0  0
    3.1148   -0.2769    2.3820 C   0  0  0  0  0  0  0  0  0  0  0  0
    3.3714    3.0446    0.0330 O   0  0  0  0  0  0  0  0  0  0  0  0
    3.6495   -1.7027    2.2540 C   0  0  0  0  0  0  0  0  0  0  0  0
   -1.1463    1.2226   -1.0959 O   0  0  0  0  0  0  0  0  0  0  0  0
    1.2280    1.9798    2.2877 O   0  0  0  0  0  0  0  0  0  0  0  0
    2.5243   -0.2464    3.2977 H   0  0  0  0  0  0  0  0  0  0  0  0
    5.3054    0.3886    3.5115 C   0  0  0  0  0  0  0  0  0  0  0  0
    5.8541   -0.9985    3.0735 C   0  0  0  0  0  0  0  0  0  0  0  0
    4.7471   -2.0056    3.2863 C   0  0  0  0  0  0  0  0  0  0  0  0
    6.5747    1.2419    3.4608 C   0  0  0  0  0  0  0  0  0  0  0  0
    7.6422    0.3062    4.0956 C   0  0  0  0  0  0  0  0  0  0  0  0
    7.1266   -1.1428    3.8942 C   0  0  0  0  0  0  0  0  0  0  0  0
    8.1601   -1.9734    3.1308 C   0  0  0  0  0  0  0  0  0  0  0  0
    9.4365   -2.0438    3.9288 C   0  0  0  0  0  0  0  0  0  0  0  0
   10.5517   -1.5785    3.4228 C   0  0  0  0  0  0  0  0  0  0  0  0
   11.8282   -1.6489    4.2208 C   0  0  0  0  0  0  0  0  0  0  0  0
   12.8617   -2.4795    3.4574 C   0  0  0  0  0  0  0  0  0  0  0  0
   14.1577   -2.5510    4.2675 C   0  0  0  0  0  0  0  0  0  0  0  0
   12.3187   -3.8931    3.2382 C   0  0  0  0  0  0  0  0  0  0  0  0
    4.7722    0.3259    4.8358 O   0  0  0  0  0  0  0  0  0  0  0  0
    6.9059   -1.6034    4.8572 H   0  0  0  0  0  0  0  0  0  0  0  0
    2.8605   -0.4474   -0.0620 C   0  0  0  0  0  0  0  0  0  0  0  0
   12.3712   -0.2354    4.4400 C   0  0  0  0  0  0  0  0  0  0  0  0
    6.2259   -0.9549    1.5900 C   0  0  0  0  0  0  0  0  0  0  0  0
    7.6171   -3.3870    2.9116 C   0  0  0  0  0  0  0  0  0  0  0  0
  1  2  1  0      
  1  3  1  0      
  3  4  1  0      
  4  5  1  0      
  5  6  1  0      
  6  2  1  0      
  4  7  1  0      
  7  8  1  0      
  8  9  2  0      
 10  5  1  0      
 10  9  1  0      
 10 12  1  0      
  7 11  2  0      
  1 13  1  0      
  4 14  1  0      
 10 15  1  0      
  9 16  1  0      
 16 17  1  0      
 17 18  1  0      
 18 12  1  0      
 16 19  1  0      
 19 20  1  0      
 20 21  1  0      
 21 17  1  0      
 21 22  1  0      
 22 23  1  0      
 23 24  2  0      
 24 25  1  0      
 25 26  1  0      
 26 27  1  0      
 26 28  1  0      
 16 29  1  0      
 21 30  1  0      
  5 31  1  0      
 25 32  1  0      
 17 33  1  0      
 22 34  1  0      
M  STY  1   1 SUP
M  SLB  1   1   1
M  SAL   1  1  31
M  SBL   1  1  34
M  SMT   1 Me
M  SBV   1 34   -7.2201    7.7385
M  STY  1   2 SUP
M  SLB  1   2   2
M  SAL   2  1  32
M  SBL   2  1  35
M  SMT   2 Me
M  SBV   2 35   -7.6321    7.6286
M  STY  1   3 SUP
M  SLB  1   3   3
M  SAL   3  1  33
M  SBL   3  1  36
M  SMT   3 Me
M  SBV   3 36   -7.2199    7.7385
M  STY  1   4 SUP
M  SLB  1   4   4
M  SAL   4  1  34
M  SBL   4  1  37
M  SMT   4 Me
M  SBV   4 37   -7.8034    7.4979
M  END
$$$$
