# Supplementary material for: Secondary Metabolites of a Mangrove Endophytic Fungus Aspergillus terreus (No. GX7-3B) from the South China Sea
Source: MDPI journal article supplement (doi:10.3390/md11072616), 2013-07-19
Supplement: s17 [file s17]

marinedrugs-11-02616-s008.mol
  ChemDraw01201408412D

 34 37  0  0  0  0  0  0  0  0999 V2000
   -3.4520   -1.6871    0.0000 C   0  0  0  0  0  0  0  0  0  0  0  0
   -3.4520   -0.8621    0.0000 C   0  0  0  0  0  0  0  0  0  0  0  0
   -2.7375   -2.0996    0.0000 C   0  0  0  0  0  0  0  0  0  0  0  0
   -2.0230   -1.6871    0.0000 C   0  0  0  0  0  0  0  0  0  0  0  0
   -2.0230   -0.8621    0.0000 C   0  0  0  0  0  0  0  0  0  0  0  0
   -2.7375   -0.4496    0.0000 C   0  0  0  0  0  0  0  0  0  0  0  0
   -1.3086   -2.0996    0.0000 C   0  0  0  0  0  0  0  0  0  0  0  0
   -0.5941   -1.6871    0.0000 C   0  0  0  0  0  0  0  0  0  0  0  0
   -0.5941   -0.8621    0.0000 C   0  0  0  0  0  0  0  0  0  0  0  0
   -1.3086   -0.4496    0.0000 C   0  0  0  0  0  0  0  0  0  0  0  0
   -1.3086   -2.9246    0.0000 O   0  0  0  0  0  0  0  0  0  0  0  0
   -1.3086    0.3754    0.0000 C   0  0  0  0  0  0  0  0  0  0  0  0
   -4.1664   -2.0996    0.0000 O   0  0  0  0  0  0  0  0  0  0  0  0
   -2.2366   -2.4840    0.0000 O   0  0  0  0  0  0  0  0  0  0  0  0
   -1.3086   -1.2746    0.0000 H   0  0  0  0  0  0  0  0  0  0  0  0
    0.1204   -0.4496    0.0000 C   0  0  0  0  0  0  0  0  0  0  0  0
    0.1204    0.3754    0.0000 C   0  0  0  0  0  0  0  0  0  0  0  0
   -0.5941    0.7879    0.0000 C   0  0  0  0  0  0  0  0  0  0  0  0
    0.9050   -0.7046    0.0000 C   0  0  0  0  0  0  0  0  0  0  0  0
    1.3899   -0.0371    0.0000 C   0  0  0  0  0  0  0  0  0  0  0  0
    0.9050    0.6303    0.0000 C   0  0  0  0  0  0  0  0  0  0  0  0
    0.6915    1.4272    0.0000 C   0  0  0  0  0  0  0  0  0  0  0  0
    1.4059    1.8397    0.0000 C   0  0  0  0  0  0  0  0  0  0  0  0
    2.2028    1.6262    0.0000 C   0  0  0  0  0  0  0  0  0  0  0  0
    2.7862    2.2095    0.0000 C   0  0  0  0  0  0  0  0  0  0  0  0
    3.5831    1.9960    0.0000 C   0  0  0  0  0  0  0  0  0  0  0  0
    4.1664    2.5794    0.0000 C   0  0  0  0  0  0  0  0  0  0  0  0
    3.7966    1.1991    0.0000 C   0  0  0  0  0  0  0  0  0  0  0  0
    0.1204   -1.2746    0.0000 O   0  0  0  0  0  0  0  0  0  0  0  0
    1.7300    0.6303    0.0000 H   0  0  0  0  0  0  0  0  0  0  0  0
   -2.0242   -0.0371    0.0000 C   0  0  0  0  0  0  0  0  0  0  0  0
    2.3731    2.9246    0.0000 C   0  0  0  0  0  0  0  0  0  0  0  0
    0.1194    1.2004    0.0000 C   0  0  0  0  0  0  0  0  0  0  0  0
    0.1071    2.0116    0.0000 C   0  0  0  0  0  0  0  0  0  0  0  0
  1  2  1  0      
  1  3  1  0      
  3  4  1  0      
  4  5  1  0      
  5  6  1  0      
  6  2  1  0      
  4  7  1  0      
  7  8  1  0      
  8  9  2  0      
 10  5  1  0      
 10  9  1  0      
 10 12  1  0      
  7 11  2  0      
  1 13  1  1      
  4 14  1  6      
 10 15  1  6      
  9 16  1  0      
 16 17  1  0      
 17 18  1  0      
 18 12  1  0      
 16 19  1  0      
 19 20  1  0      
 20 21  1  0      
 21 17  1  0      
 21 22  1  0      
 22 23  1  0      
 23 24  2  0      
 24 25  1  0      
 25 26  1  0      
 26 27  1  0      
 26 28  1  0      
 16 29  1  6      
 21 30  1  6      
  5 31  1  1      
 25 32  1  6      
 17 33  1  1      
 22 34  1  6      
M  STY  1   1 SUP
M  SLB  1   1   1
M  SAL   1  1  31
M  SBL   1  1  34
M  SMT   1 Me
M  SBV   1 34   -7.2201    7.7385
M  STY  1   2 SUP
M  SLB  1   2   2
M  SAL   2  1  32
M  SBL   2  1  35
M  SMT   2 Me
M  SBV   2 35   -7.6321    7.6286
M  STY  1   3 SUP
M  SLB  1   3   3
M  SAL   3  1  33
M  SBL   3  1  36
M  SMT   3 Me
M  SBV   3 36   -7.2199    7.7385
M  STY  1   4 SUP
M  SLB  1   4   4
M  SAL   4  1  34
M  SBL   4  1  37
M  SMT   4 Me
M  SBV   4 37   -7.8034    7.4979
M  END
