# Supplementary material for: Secondary Metabolites of a Mangrove Endophytic Fungus Aspergillus terreus (No. GX7-3B) from the South China Sea
Source: MDPI journal article supplement (doi:10.3390/md11072616), 2013-07-19
Supplement: s18 [file s18]

marinedrugs-11-02616-s009.mol
  corina  04141406193D 1   1.00000     0.00000 
CORINA 3.49 0023  12.04.2013
 41 44  0  0  0  0  0  0  0  0999 V2000
   -0.0893    3.3473    1.0346 C   0  0  0  0  0  0  0  0  0  0  0  0
    0.0149    1.8217    1.0482 C   0  0  0  0  0  0  0  0  0  0  0  0
    1.2808    3.9586    0.7266 C   0  0  0  0  0  0  0  0  0  0  0  0
    2.2758    3.5157    1.7982 C   0  0  0  0  0  0  0  0  0  0  0  0
    2.3929    1.9882    1.7732 C   0  0  0  0  0  0  0  0  0  0  0  0
    1.0315    1.3781    2.1040 C   0  0  0  0  0  0  0  0  0  0  0  0
    3.6423    4.0970    1.5210 C   0  0  0  0  0  0  0  0  0  0  0  0
    4.7972    3.6152    2.3724 C   0  0  0  0  0  0  0  0  0  0  0  0
    4.8204    2.0833    2.3636 C   0  0  0  0  0  0  0  0  0  0  0  0
    3.4448    1.5439    2.7879 C   0  0  0  0  0  0  0  0  0  0  0  0
    3.8075    4.9173    0.6503 O   0  0  0  0  0  0  0  0  0  0  0  0
    3.4449    0.0216    2.8902 C   0  0  0  0  0  0  0  0  0  0  0  0
   -1.0253    3.7506    0.0329 O   0  0  0  0  0  0  0  0  0  0  0  0
    1.9256    3.8395    2.7783 H   0  0  0  0  0  0  0  0  0  0  0  0
    3.1895    1.9548    3.7647 H   0  0  0  0  0  0  0  0  0  0  0  0
    5.8354    1.5832    3.3754 C   0  0  0  0  0  0  0  0  0  0  0  0
    5.8742    0.0357    3.2621 C   0  0  0  0  0  0  0  0  0  0  0  0
    4.5619   -0.4858    3.8158 C   0  0  0  0  0  0  0  0  0  0  0  0
    7.2960    1.9529    3.0953 C   0  0  0  0  0  0  0  0  0  0  0  0
    8.0852    0.8732    3.8852 C   0  0  0  0  0  0  0  0  0  0  0  0
    7.1344   -0.3405    4.0350 C   0  0  0  0  0  0  0  0  0  0  0  0
    7.7733   -1.5922    3.4301 C   0  0  0  0  0  0  0  0  0  0  0  0
    8.1589   -1.3180    1.9993 C   0  0  0  0  0  0  0  0  0  0  0  0
    7.7692   -2.1306    1.0486 C   0  0  0  0  0  0  0  0  0  0  0  0
    8.2748   -1.9417   -0.3584 C   0  0  0  0  0  0  0  0  0  0  0  0
    8.9234   -3.2389   -0.8458 C   0  0  0  0  0  0  0  0  0  0  0  0
    9.4366   -3.0471   -2.2743 C   0  0  0  0  0  0  0  0  0  0  0  0
   10.0928   -3.6005    0.0721 C   0  0  0  0  0  0  0  0  0  0  0  0
    5.5448    1.8832    4.3822 H   0  0  0  0  0  0  0  0  0  0  0  0
    6.8973   -0.5069    5.0858 H   0  0  0  0  0  0  0  0  0  0  0  0
    3.6319   -0.5330    1.5866 O   0  0  0  0  0  0  0  0  0  0  0  0
    6.0251    4.1149    1.8390 O   0  0  0  0  0  0  0  0  0  0  0  0
    5.0694    1.7217    1.3660 H   0  0  0  0  0  0  0  0  0  0  0  0
    9.2747    0.4863    3.1479 O   0  0  0  0  0  0  0  0  0  0  0  0
   10.4039    1.1608    3.4158 C   0  0  0  0  0  0  0  0  0  0  0  0
   10.4216    1.9813    4.3025 O   0  0  0  0  0  0  0  0  0  0  0  0
   11.6497    0.8946    2.6106 C   0  0  0  0  0  0  0  0  0  0  0  0
    2.8255    1.5357    0.3771 C   0  0  0  0  0  0  0  0  0  0  0  0
    6.0176   -0.3740    1.7949 C   0  0  0  0  0  0  0  0  0  0  0  0
    9.0216   -1.9660    4.2320 C   0  0  0  0  0  0  0  0  0  0  0  0
    7.1053   -1.5801   -1.2763 C   0  0  0  0  0  0  0  0  0  0  0  0
  1  2  1  0      
  1  3  1  0      
  3  4  1  0      
  4  5  1  0      
  5  6  1  0      
  6  2  1  0      
  4  7  1  0      
  7  8  1  0      
  8  9  1  0      
 10  5  1  0      
 10  9  1  0      
 10 12  1  0      
  7 11  2  0      
  1 13  1  0      
  4 14  1  0      
 10 15  1  0      
  9 16  1  0      
 16 17  1  0      
 17 18  1  0      
 18 12  1  0      
 16 19  1  0      
 19 20  1  0      
 20 21  1  0      
 21 17  1  0      
 21 22  1  0      
 22 23  1  0      
 23 24  2  0      
 24 25  1  0      
 25 26  1  0      
 26 27  1  0      
 26 28  1  0      
 16 29  1  0      
 21 30  1  0      
 12 31  1  0      
  8 32  1  0      
  9 33  1  0      
 20 34  1  0      
 34 35  1  0      
 35 36  2  0      
 35 37  1  0      
  5 38  1  0      
 17 39  1  0      
 22 40  1  0      
 25 41  1  0      
M  STY  1   1 SUP
M  SLB  1   1   1
M  SAL   1  1  38
M  SBL   1  1  41
M  SMT   1 Me
M  SBV   1 41   -7.6395    7.9172
M  STY  1   2 SUP
M  SLB  1   2   2
M  SAL   2  1  39
M  SBL   2  1  42
M  SMT   2 Me
M  SBV   2 42   -7.4261    7.9447
M  STY  1   3 SUP
M  SLB  1   3   3
M  SAL   3  1  40
M  SBL   3  1  43
M  SMT   3 Me
M  SBV   3 43   -8.0096    7.7042
M  STY  1   4 SUP
M  SLB  1   4   4
M  SAL   4  1  41
M  SBL   4  1  44
M  SMT   4 Me
M  SBV   4 44   -7.8383    7.8348
M  END
$$$$
