# Supplementary material for: Secondary Metabolites of a Mangrove Endophytic Fungus Aspergillus terreus (No. GX7-3B) from the South China Sea
Source: MDPI journal article supplement (doi:10.3390/md11072616), 2013-07-19
Supplement: s20 [file s20]

marinedrugs-11-02616-s010.mol
  corina  04141406193D 1   1.00000     0.00000 
CORINA 3.49 0023  12.04.2013
 57 60  0  0  0  0  0  0  0  0999 V2000
   -5.5673    3.4188   -2.5636 O   0  0  0  0  0  0  0  0  0  0  0  0
   -4.7009    2.4102   -2.0006 C   0  0  0  0  0  0  0  0  0  0  0  0
   -5.5076    1.3378   -1.3261 C   0  0  0  0  0  0  0  0  0  0  0  0
   -6.3367    1.5679   -0.2731 N   0  0  0  0  0  0  0  0  0  0  0  0
   -7.1176    0.3907    0.1721 C   0  0  0  0  0  0  0  0  0  0  0  0
   -8.4308    0.8124    0.7743 C   0  0  0  0  0  0  0  0  0  0  0  0
   -9.1626    1.8040    0.2552 O   0  0  0  0  0  0  0  0  0  0  0  0
  -10.4420    2.1155    0.8553 C   0  0  0  0  0  0  0  0  0  0  0  0
  -11.2544    3.0050   -0.0463 C   0  0  0  0  0  0  0  0  0  0  0  0
  -10.7198    4.0822   -0.6740 N   0  0  0  0  0  0  0  0  0  0  0  0
  -11.5281    4.6893   -1.7575 C   0  0  0  0  0  0  0  0  0  0  0  0
  -10.7995    5.9126   -2.2657 C   0  0  0  0  0  0  0  0  0  0  0  0
   -9.9428    5.7828   -3.2869 O   0  0  0  0  0  0  0  0  0  0  0  0
   -9.1803    6.9373   -3.7210 C   0  0  0  0  0  0  0  0  0  0  0  0
   -7.9256    6.4626   -4.4072 C   0  0  0  0  0  0  0  0  0  0  0  0
   -6.9415    5.8386   -3.7045 N   0  0  0  0  0  0  0  0  0  0  0  0
   -6.0679    4.9257   -4.4625 C   0  0  0  0  0  0  0  0  0  0  0  0
   -5.1139    4.2101   -3.5406 C   0  0  0  0  0  0  0  0  0  0  0  0
  -11.6758    3.6918   -2.9090 C   0  0  0  0  0  0  0  0  0  0  0  0
  -12.4699    2.4992   -2.4419 C   0  0  0  0  0  0  0  0  0  0  0  0
  -13.8466    2.4936   -2.5667 C   0  0  0  0  0  0  0  0  0  0  0  0
  -14.5750    1.3997   -2.1381 C   0  0  0  0  0  0  0  0  0  0  0  0
  -13.9267    0.3112   -1.5851 C   0  0  0  0  0  0  0  0  0  0  0  0
  -12.5499    0.3165   -1.4611 C   0  0  0  0  0  0  0  0  0  0  0  0
  -11.8211    1.4086   -1.8937 C   0  0  0  0  0  0  0  0  0  0  0  0
   -9.4251    4.6683   -0.3117 C   0  0  0  0  0  0  0  0  0  0  0  0
  -12.4405    2.7492   -0.1954 O   0  0  0  0  0  0  0  0  0  0  0  0
  -10.2636    2.7726    2.2237 C   0  0  0  0  0  0  0  0  0  0  0  0
  -11.6231    3.2425    2.7450 C   0  0  0  0  0  0  0  0  0  0  0  0
   -9.6647    1.7598    3.2017 C   0  0  0  0  0  0  0  0  0  0  0  0
   -8.8338    0.2134    1.7517 O   0  0  0  0  0  0  0  0  0  0  0  0
   -6.3098   -0.3823    1.2205 C   0  0  0  0  0  0  0  0  0  0  0  0
   -5.1170   -1.0258    0.5614 C   0  0  0  0  0  0  0  0  0  0  0  0
   -3.8383   -0.6598    0.9379 C   0  0  0  0  0  0  0  0  0  0  0  0
   -2.7442   -1.2500    0.3333 C   0  0  0  0  0  0  0  0  0  0  0  0
   -2.9289   -2.2066   -0.6474 C   0  0  0  0  0  0  0  0  0  0  0  0
   -4.2076   -2.5732   -1.0232 C   0  0  0  0  0  0  0  0  0  0  0  0
   -5.3017   -1.9862   -0.4156 C   0  0  0  0  0  0  0  0  0  0  0  0
   -6.4597    2.8566    0.4089 C   0  0  0  0  0  0  0  0  0  0  0  0
   -5.4136    0.1918   -1.7540 O   0  0  0  0  0  0  0  0  0  0  0  0
   -3.6618    3.0079   -1.0584 C   0  0  0  0  0  0  0  0  0  0  0  0
   -2.7642    1.8937   -0.5163 C   0  0  0  0  0  0  0  0  0  0  0  0
   -2.8089    4.0252   -1.8189 C   0  0  0  0  0  0  0  0  0  0  0  0
   -3.9227    4.3619   -3.7061 O   0  0  0  0  0  0  0  0  0  0  0  0
   -6.9200    3.8766   -5.1879 C   0  0  0  0  0  0  0  0  0  0  0  0
   -6.0325    3.0196   -6.0533 C   0  0  0  0  0  0  0  0  0  0  0  0
   -5.5688    1.8064   -5.5799 C   0  0  0  0  0  0  0  0  0  0  0  0
   -4.7547    1.0203   -6.3736 C   0  0  0  0  0  0  0  0  0  0  0  0
   -4.4045    1.4471   -7.6409 C   0  0  0  0  0  0  0  0  0  0  0  0
   -4.8689    2.6599   -8.1147 C   0  0  0  0  0  0  0  0  0  0  0  0
   -5.6866    3.4440   -7.3226 C   0  0  0  0  0  0  0  0  0  0  0  0
   -6.7402    6.0937   -2.2737 C   0  0  0  0  0  0  0  0  0  0  0  0
   -7.7919    6.6682   -5.6004 O   0  0  0  0  0  0  0  0  0  0  0  0
  -10.0156    7.7461   -4.7210 C   0  0  0  0  0  0  0  0  0  0  0  0
  -11.3736    8.0789   -4.0998 C   0  0  0  0  0  0  0  0  0  0  0  0
   -9.2815    9.0431   -5.0673 C   0  0  0  0  0  0  0  0  0  0  0  0
  -11.0020    6.9874   -1.7566 O   0  0  0  0  0  0  0  0  0  0  0  0
  1  2  1  0      
  2  3  1  0      
  3  4  1  0      
  4  5  1  0      
  5  6  1  0      
  6  7  1  0      
  7  8  1  0      
  8  9  1  0      
  9 10  1  0      
 10 11  1  0      
 11 12  1  0      
 12 13  1  0      
 13 14  1  0      
 14 15  1  0      
 15 16  1  0      
 16 17  1  0      
 17 18  1  0      
  1 18  1  0      
 11 19  1  0      
 19 20  1  0      
 20 21  2  0      
 21 22  1  0      
 22 23  2  0      
 23 24  1  0      
 24 25  2  0      
 25 20  1  0      
 10 26  1  0      
  9 27  2  0      
  8 28  1  0      
 28 29  1  0      
 28 30  1  0      
  6 31  2  0      
  5 32  1  0      
 32 33  1  0      
 33 34  2  0      
 34 35  1  0      
 35 36  2  0      
 36 37  1  0      
 37 38  2  0      
 38 33  1  0      
  4 39  1  0      
  3 40  2  0      
  2 41  1  0      
 41 42  1  0      
 41 43  1  0      
 18 44  2  0      
 17 45  1  0      
 45 46  1  0      
 46 47  2  0      
 47 48  1  0      
 48 49  2  0      
 49 50  1  0      
 50 51  2  0      
 51 46  1  0      
 16 52  1  0      
 15 53  2  0      
 14 54  1  0      
 54 55  1  0      
 54 56  1  0      
 12 57  2  0      
M  END
$$$$
