# Supplementary material for: Secondary Metabolites of a Mangrove Endophytic Fungus Aspergillus terreus (No. GX7-3B) from the South China Sea
Source: MDPI journal article supplement (doi:10.3390/md11072616), 2013-07-19
Supplement: s21 [file s21]

marinedrugs-11-02616-s010.mol
  ChemDraw01201408412D

 57 60  0  0  0  0  0  0  0  0999 V2000
    0.0411   -2.9583    0.0000 O   0  0  0  0  0  0  0  0  0  0  0  0
    0.8658   -2.9583    0.0000 C   0  0  0  0  0  0  0  0  0  0  0  0
    1.6414   -2.6786    0.0000 C   0  0  0  0  0  0  0  0  0  0  0  0
    2.2753   -2.1500    0.0000 N   0  0  0  0  0  0  0  0  0  0  0  0
    2.6859   -1.4343    0.0000 C   0  0  0  0  0  0  0  0  0  0  0  0
    2.8330   -0.6224    0.0000 C   0  0  0  0  0  0  0  0  0  0  0  0
    2.6859    0.1896    0.0000 O   0  0  0  0  0  0  0  0  0  0  0  0
    2.2717    0.9016    0.0000 C   0  0  0  0  0  0  0  0  0  0  0  0
    1.6414    1.4338    0.0000 C   0  0  0  0  0  0  0  0  0  0  0  0
    0.8676    1.7208    0.0000 N   0  0  0  0  0  0  0  0  0  0  0  0
    0.0430    1.7208    0.0000 C   0  0  0  0  0  0  0  0  0  0  0  0
   -0.7345    1.4447    0.0000 C   0  0  0  0  0  0  0  0  0  0  0  0
   -1.3702    0.9179    0.0000 O   0  0  0  0  0  0  0  0  0  0  0  0
   -1.7844    0.2041    0.0000 C   0  0  0  0  0  0  0  0  0  0  0  0
   -1.8988   -0.6133    0.0000 C   0  0  0  0  0  0  0  0  0  0  0  0
   -1.7480   -1.4234    0.0000 N   0  0  0  0  0  0  0  0  0  0  0  0
   -1.3393   -2.1391    0.0000 C   0  0  0  0  0  0  0  0  0  0  0  0
   -0.7109   -2.6731    0.0000 C   0  0  0  0  0  0  0  0  0  0  0  0
    0.0430    2.5458    0.0000 C   0  0  0  0  0  0  0  0  0  0  0  0
    0.7574    2.9583    0.0000 C   0  0  0  0  0  0  0  0  0  0  0  0
    1.4719    2.5458    0.0000 C   0  0  0  0  0  0  0  0  0  0  0  0
    2.1864    2.9583    0.0000 C   0  0  0  0  0  0  0  0  0  0  0  0
    2.1864    3.7833    0.0000 C   0  0  0  0  0  0  0  0  0  0  0  0
    1.4719    4.1958    0.0000 C   0  0  0  0  0  0  0  0  0  0  0  0
    0.7574    3.7833    0.0000 C   0  0  0  0  0  0  0  0  0  0  0  0
    1.4510    2.3042    0.0000 C   0  0  0  0  0  0  0  0  0  0  0  0
    2.2248    2.0172    0.0000 O   0  0  0  0  0  0  0  0  0  0  0  0
    2.9862    1.3141    0.0000 C   0  0  0  0  0  0  0  0  0  0  0  0
    2.9862    2.1391    0.0000 C   0  0  0  0  0  0  0  0  0  0  0  0
    3.7007    0.9016    0.0000 C   0  0  0  0  0  0  0  0  0  0  0  0
    3.6299   -0.8359    0.0000 O   0  0  0  0  0  0  0  0  0  0  0  0
    3.4827   -1.6478    0.0000 C   0  0  0  0  0  0  0  0  0  0  0  0
    3.4827   -2.4728    0.0000 C   0  0  0  0  0  0  0  0  0  0  0  0
    2.7683   -2.8853    0.0000 C   0  0  0  0  0  0  0  0  0  0  0  0
    2.7683   -3.7103    0.0000 C   0  0  0  0  0  0  0  0  0  0  0  0
    3.4827   -4.1228    0.0000 C   0  0  0  0  0  0  0  0  0  0  0  0
    4.1972   -3.7103    0.0000 C   0  0  0  0  0  0  0  0  0  0  0  0
    4.1972   -2.8853    0.0000 C   0  0  0  0  0  0  0  0  0  0  0  0
    3.0722   -2.3635    0.0000 C   0  0  0  0  0  0  0  0  0  0  0  0
    2.0539   -3.3930    0.0000 O   0  0  0  0  0  0  0  0  0  0  0  0
    0.8658   -3.7833    0.0000 C   0  0  0  0  0  0  0  0  0  0  0  0
    0.1513   -4.1958    0.0000 C   0  0  0  0  0  0  0  0  0  0  0  0
    1.5803   -4.1958    0.0000 C   0  0  0  0  0  0  0  0  0  0  0  0
   -1.1234   -3.3876    0.0000 O   0  0  0  0  0  0  0  0  0  0  0  0
   -2.0538   -2.5516    0.0000 C   0  0  0  0  0  0  0  0  0  0  0  0
   -2.7683   -2.1391    0.0000 C   0  0  0  0  0  0  0  0  0  0  0  0
   -2.7683   -1.3141    0.0000 C   0  0  0  0  0  0  0  0  0  0  0  0
   -3.4827   -0.9016    0.0000 C   0  0  0  0  0  0  0  0  0  0  0  0
   -4.1972   -1.3141    0.0000 C   0  0  0  0  0  0  0  0  0  0  0  0
   -4.1972   -2.1391    0.0000 C   0  0  0  0  0  0  0  0  0  0  0  0
   -3.4827   -2.5516    0.0000 C   0  0  0  0  0  0  0  0  0  0  0  0
   -2.5449   -1.6370    0.0000 C   0  0  0  0  0  0  0  0  0  0  0  0
   -2.7238   -0.6133    0.0000 O   0  0  0  0  0  0  0  0  0  0  0  0
   -2.5812    0.4176    0.0000 C   0  0  0  0  0  0  0  0  0  0  0  0
   -2.7948    1.2145    0.0000 C   0  0  0  0  0  0  0  0  0  0  0  0
   -3.2957    0.0051    0.0000 C   0  0  0  0  0  0  0  0  0  0  0  0
   -1.1470    2.1592    0.0000 O   0  0  0  0  0  0  0  0  0  0  0  0
  1  2  1  0      
  2  3  1  0      
  3  4  1  0      
  4  5  1  0      
  5  6  1  0      
  6  7  1  0      
  7  8  1  0      
  8  9  1  0      
  9 10  1  0      
 10 11  1  0      
 11 12  1  0      
 12 13  1  0      
 13 14  1  0      
 14 15  1  0      
 15 16  1  0      
 16 17  1  0      
 17 18  1  0      
  1 18  1  0      
 11 19  1  1      
 19 20  1  0      
 20 21  2  0      
 21 22  1  0      
 22 23  2  0      
 23 24  1  0      
 24 25  2  0      
 25 20  1  0      
 10 26  1  0      
  9 27  2  0      
  8 28  1  6      
 28 29  1  0      
 28 30  1  0      
  6 31  2  0      
  5 32  1  6      
 32 33  1  0      
 33 34  2  0      
 34 35  1  0      
 35 36  2  0      
 36 37  1  0      
 37 38  2  0      
 38 33  1  0      
  4 39  1  0      
  3 40  2  0      
  2 41  1  6      
 41 42  1  0      
 41 43  1  0      
 18 44  2  0      
 17 45  1  1      
 45 46  1  0      
 46 47  2  0      
 47 48  1  0      
 48 49  2  0      
 49 50  1  0      
 50 51  2  0      
 51 46  1  0      
 16 52  1  0      
 15 53  2  0      
 14 54  1  1      
 54 55  1  0      
 54 56  1  0      
 12 57  2  0      
M  END
